# Supplementary material for: Waveband-dependent photochemical processing of graphene oxide in fabricating reduced graphene oxide film and graphene oxide–Ag nanoparticles film
Source: Royal Society of Chemistry journal article supplement (doi:10.1039/c3ra45355c), 2013-11-22
Supplement: c3ra45355c.pdf [file c3ra45355c.pdf]

## Supporting Information

### Waveband-Dependent Photochemical Processing of Graphene Oxide in Fabricating Reduced Graphene Oxide Film and Graphene Oxide-Ag Nanoparticles Film

Bing Li,<sup>a,b</sup> Xintong Zhang,<sup>\*a</sup> Peng Chen,<sup>a</sup> Xinghua Li,<sup>a</sup> Lingling Wang,<sup>a</sup> Ceng Zhang,<sup>a</sup>  
Weitao Zheng,<sup>c</sup> Yichun Liu<sup>\*a</sup>

<sup>a</sup>Center for Advanced Optoelectronic Functional Materials Research, and Key Laboratory for UV-Emitting Materials and Technology of Ministry of Education, Northeast Normal University, 5268 Renmin Street, Changchun 130024, People's Republic of China; Department of Materials Science, Jilin University, Changchun 130012, People's Republic of China.

\*Corresponding author

Tel./Fax: +86-431-85099772.

Email address: xtzhang@nenu.edu.cn; ycliu@nenu.edu.cn

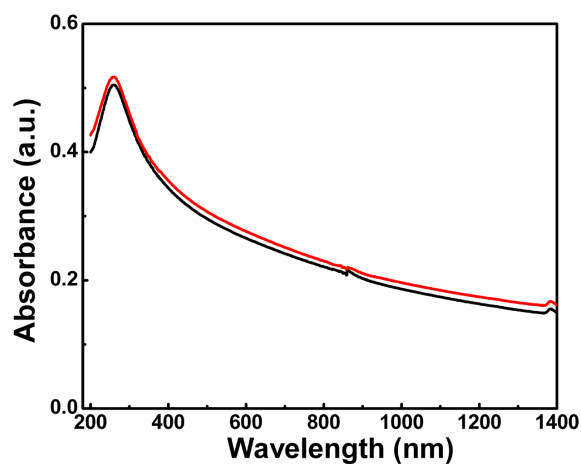

**Fig. S1** UV-visible absorption spectra of GO film treated with band 1 irradiation for 16 h (black line) and the same sample treated with band 1 irradiation again in  $\text{AgNO}_3$  solution (red line). The two curves are almost same in shape, indicating no photo-reduction of  $\text{Ag}^+$  occurred on the already photo-reduced GO films.

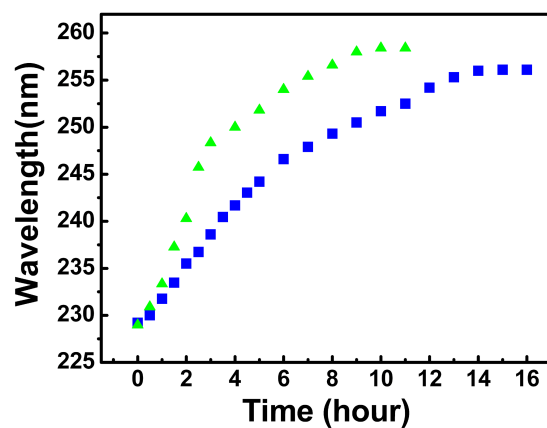

**Fig. S2** Position shift of the absorption peak of GO films at 227nm as a function of irradiation time under the irradiation from band 1 (■square) in air and (▲) in ethanol atmosphere. The data show that ethanol atmosphere can accelerate the photo-reduction process of GO film.
